# Supplementary material
Source: publisher figshare collection journal article supplement (https://frontiersin.figshare.com/ndownloader/files/14566037)
Supplement: Supplementary file [file 14566037]

## *Supplementary Material*

# **Photoperiodic Effects on Diurnal Rhythms in Cell Numbers of Peripheral Leukocytes in Domestic Pigs**

**Larissa C. Engert, Ulrike Weiler, Birgit Pfaffinger, Volker Stefanski, Sonja S. Schmucker\***

Behavioral Physiology of Livestock, Institute of Animal Science, University of Hohenheim, Stuttgart, Germany

**\* Correspondence:**

Dr. Sonja S. Schmucker

Sonja.Schmucker@uni-hohenheim.de

### **Contents**

|                                                                                                                          |    |
|--------------------------------------------------------------------------------------------------------------------------|----|
| FIGURE S1   Mean values .....                                                                                            | 2  |
| FIGURE S2   Cell type comparisons of relative amplitudes .....                                                           | 3  |
| FIGURE S3   Cell type comparisons of peak times .....                                                                    | 4  |
| FIGURE S4   Diurnal rhythms of the cell numbers of CD8 $\alpha^-$ and CD8 $\alpha^+$ $\gamma\delta$ T cells.....         | 5  |
| FIGURE S5   Diurnal profiles (mean $\pm$ SEM) of the investigated variables in the study .....                           | 6  |
| TABLE S1   Results of individual cosinor analyses per animal.....                                                        | 7  |
| TABLE S2   Results of generalized linear mixed model analyses .....                                                      | 8  |
| TABLE S3   Results of overall cosinor analyses for CD8 $\alpha^-$ and CD8 $\alpha^+$ $\gamma\delta$ T cells.....         | 11 |
| TABLE S4   Summary of generalized linear mixed models for CD8 $\alpha^-$ and CD8 $\alpha^+$ $\gamma\delta$ T cells ..... | 11 |
| TABLE S5   Statistical details for pairwise comparisons of mesor values .....                                            | 12 |
| TABLE S6   Statistical details for pairwise comparisons of relative amplitudes.....                                      | 13 |
| TABLE S7   Statistical details for pairwise comparisons of peak times .....                                              | 14 |
| TABLE S8   Statistical details for pairwise comparisons of mean values .....                                             | 15 |
| TABLE S9   Statistical details for mixed ANOVA.....                                                                      | 16 |

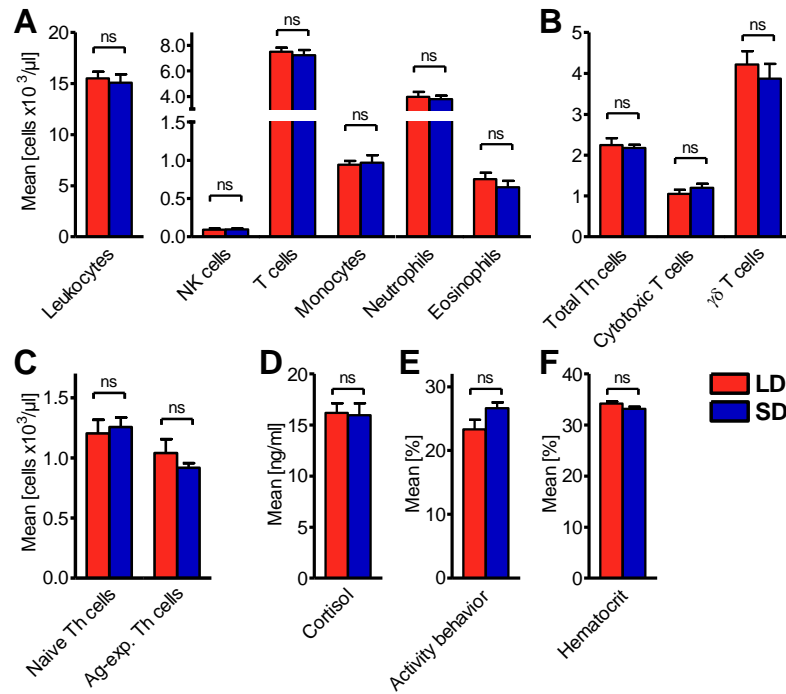

**FIGURE S1** | Mean values of the cell numbers of different immune cell populations in blood, plasma cortisol concentration, activity behavior, and hematocrit in domestic pigs. Values for pigs held under long day conditions (LD) are shown in red, values for pigs held under short day conditions (SD) are shown in blue for (A) main immune cell populations, (B) different T cell subpopulations, (C) Th cell subtypes with distinctive differentiation states, (D) plasma cortisol concentration, (E) activity behavior, and (F) hematocrit. The graphs and statistical analyses include values calculated from the 26 samplings per pig for all animals per treatment (mean ± SEM, LD n = 9, SD n = 11). Pairwise comparisons were performed with two-tailed, unpaired Student's *t*-tests (total leukocytes, T cells, monocytes, neutrophils, eosinophils, γδ T cells, plasma cortisol concentration, and hematocrit), unequal variance *t*-test (activity behavior), or two-tailed Mann-Whitney *U* tests (NK cells, total Th cells, cytotoxic T cells, naive Th cells, and Ag-exp. Th cells); refer to Table S8 in Supplementary Material for statistical details, ns  $P \geq 0.05$ .

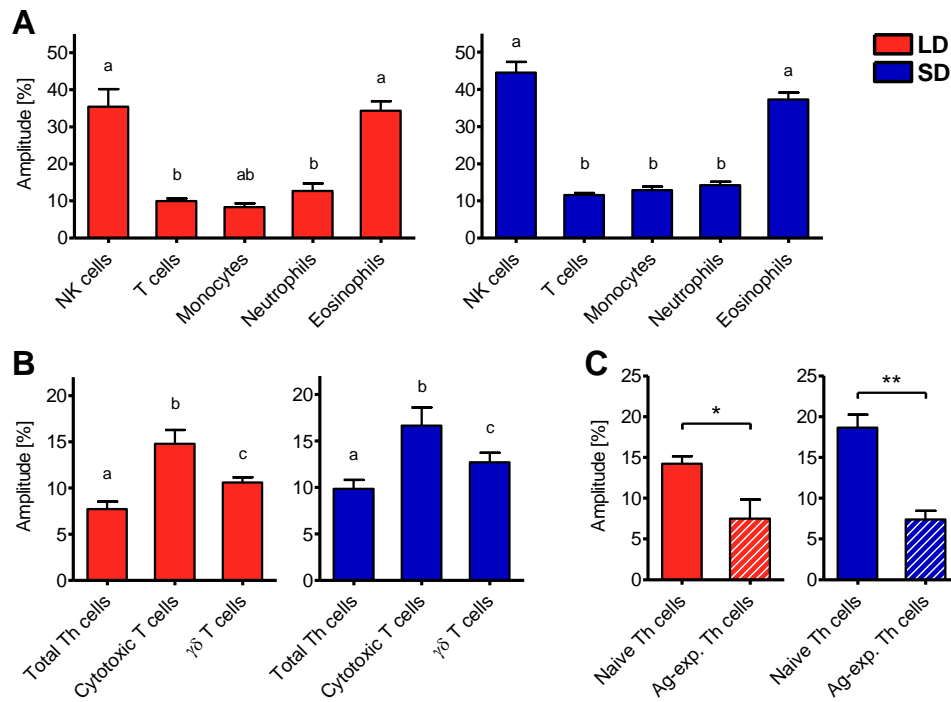

**FIGURE S2** | Cell type comparisons of relative amplitudes of the cell numbers of different immune cell populations in porcine blood within treatments. Values for pigs held under long day conditions (LD) are shown in red, values for pigs held under short day conditions (SD) are shown in blue. The graphs and statistical analyses only include values of animals with significant ( $P < 0.05$ ) diurnal rhythm in individual cosinor analyses in all compared cell types, respectively (mean  $\pm$  SEM, LD  $n = 5$ –8, SD  $n = 7$ –11, refer to Table S1 in Supplementary Material). Hatched bars indicate missing diurnal rhythm in overall cosinor analyses with combined datasets of all animals per treatment (significant diurnal rhythm at  $P < 0.05$ , refer to Table 1 in main text). **(A)** Multiple comparisons within main immune cell populations for pigs held under LD ( $n = 5$ ) were performed with Friedman test ( $\chi^2(4) = 16.48$ ,  $P = 0.002$ ; NK cells: 25th–75th percentile (Pctl) 27.5%–45.1%, T cells: Pctl 8.3%–11.2%, monocytes: Pctl 6.3%–10.4%, neutrophils: Pctl 9.7%–16.7%, eosinophils: Pctl 29.6%–39.7%) followed by Wilcoxon signed-rank *post hoc* tests with Benjamini-Hochberg correction and for pigs held under SD ( $n = 10$ ) with repeated measures ANOVA with Greenhouse-Geisser correction ( $F(1.99, 17.92) = 85.21$ ,  $P = 7.16 \times 10^{-10}$ ; NK cells: 95% confidence interval (CI) 37.9%–51.0%, T cells: CI 10.3%–12.8%, monocytes: CI 10.7%–15.1%, neutrophils: CI 12.1%–16.3%, eosinophils: CI 33.0%–41.5%) followed by Bonferroni *post hoc* tests. **(B)** Multiple comparisons within different T cell subpopulations for pigs held under LD ( $n = 8$ ) were performed with repeated measures ANOVA ( $F(2, 14) = 19.51$ ,  $P = 8.96 \times 10^{-5}$ ; total Th cells: CI 5.8%–9.6%, cytotoxic T cells: CI 11.2%–18.3%,  $\gamma\delta$  T cells: CI 9.3%–11.9%) followed by Bonferroni *post hoc* tests and for pigs held under SD ( $n = 11$ ) with Friedman test ( $\chi^2(2) = 9.46$ ,  $P = 0.009$ ; total Th cells: Pctl 7.0%–12.1%, cytotoxic T cells: Pctl 10.4%–19.0%,  $\gamma\delta$  T cells: Pctl 10.8%–13.3%) followed by Wilcoxon signed-rank *post hoc* tests with Bonferroni-Holm correction. Different letters indicate significant differences at  $P < 0.05$ . **(C)** Pairwise comparisons between Th cell subtypes with distinctive differentiation states (LD  $n = 6$ , SD  $n = 7$ ) were performed with two-tailed, paired Student's *t*-tests (LD:  $t(5) = 2.66$ ,  $P = 0.045$ ; naive Th cells: CI 11.9%–16.6%, Ag-exp. Th cells: CI 1.4%–13.6%; SD:  $t(6) = 5.27$ ,  $P = 0.002$ ; naive Th cells: CI 14.8%–22.5%, Ag-exp. Th cells: CI 4.8%–10.0%); \*\*  $P < 0.01$ , \*  $P < 0.05$ .

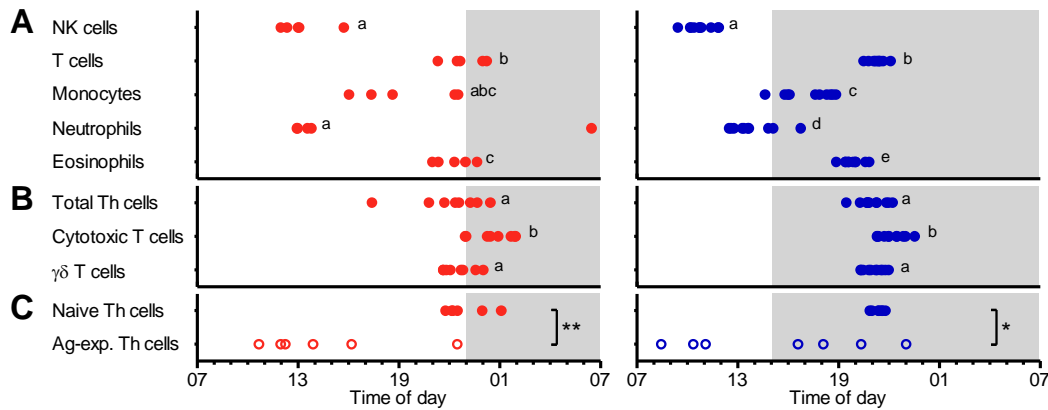

**FIGURE S3** | Cell type comparisons of peak times of the cell numbers of different immune cell populations in porcine blood within treatments. Values for pigs held under long day conditions (LD) are shown in red, values for pigs held under short day conditions (SD) are shown in blue. Shaded areas indicate lights-off in the respective treatments. The graphs and statistical analyses only include values of animals with significant ( $P < 0.05$ ) diurnal rhythm in individual cosinor analyses in all compared cell types, respectively (LD  $n = 5-8$ , SD  $n = 7-11$ , refer to Table S1 in Supplementary Material). Circles indicate missing diurnal rhythm in overall cosinor analyses with combined datasets of all animals per treatment (significant diurnal rhythm at  $P < 0.05$ , refer to Table 1 in main text). **(A)** Multiple comparisons within main immune cell populations for pigs held under LD ( $n = 5$ ) were performed with Friedman test ( $\chi^2(4) = 17.12$ ,  $P = 0.002$ ; NK cells: 25th–75th percentile (Pctl) 12:10–14:24, T cells: Pctl 21:53–00:07, monocytes: Pctl 16:42–22:26, neutrophils: Pctl 09:42–13:41, eosinophils: Pctl 21:11–23:19) followed by Wilcoxon signed-rank *post hoc* tests with Benjamini-Hochberg correction and for pigs held under SD ( $n = 10$ ) with repeated measures ANOVA ( $F(4,36) = 302.35$ ,  $P = 3.67 \times 10^{-27}$ ; NK cells: 95% confidence interval (CI) 10:13–11:19, T cells: CI 20:58–21:37, monocytes: CI 16:10–18:18, neutrophils: CI 12:53–14:48, eosinophils: CI 19:24–20:14) followed by Bonferroni *post hoc* tests. **(B)** Multiple comparisons within different T cell subpopulations for pigs held under LD ( $n = 8$ ) and SD ( $n = 11$ ) were performed with repeated measures ANOVA (LD:  $F(2,14) = 10.92$ ,  $P = 0.001$ ; total Th cells: CI 20:12–23:52, cytotoxic T cells: CI 23:38–01:39,  $\gamma\delta$  T cells: CI 21:47–23:18; SD:  $F(2,20) = 10.67$ ,  $P = 7.03 \times 10^{-04}$ ; total Th cells: CI 20:29–21:34, cytotoxic T cells: CI 21:41–22:41,  $\gamma\delta$  T cells: CI 20:43–21:31) followed by Bonferroni *post hoc* tests. Different letters indicate significant differences at  $P < 0.05$ . **(C)** Pairwise comparisons between Th cell subtypes with distinctive differentiation states (LD  $n = 6$ , SD  $n = 7$ ) were performed with two-tailed, paired Student's *t*-tests (LD:  $t(5) = 5.99$ ,  $P = 0.002$ ; naive Th cells: CI 21:35–00:18, Ag-exp. Th cells: CI 10:03–19:05; SD:  $t(6) = 2.94$ ,  $P = 0.026$ ; naive Th cells: CI 21:04–21:41, Ag-exp. Th cells: CI 10:18–20:32); \*\*  $P < 0.01$ , \*  $P < 0.05$ .

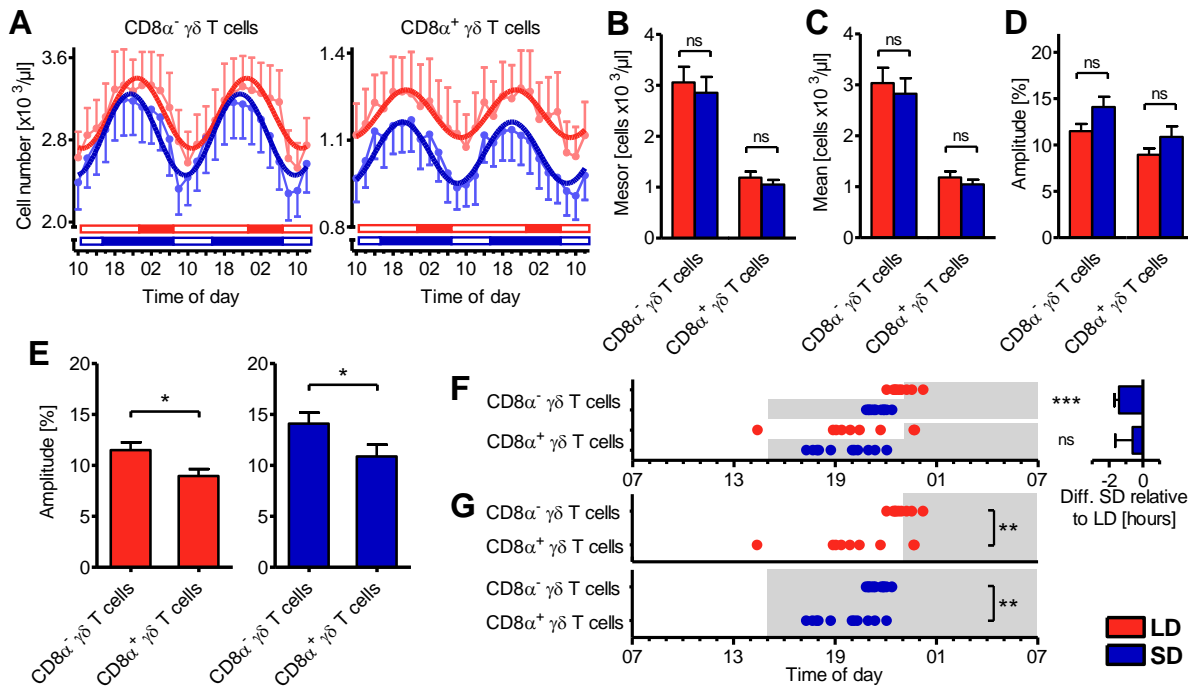

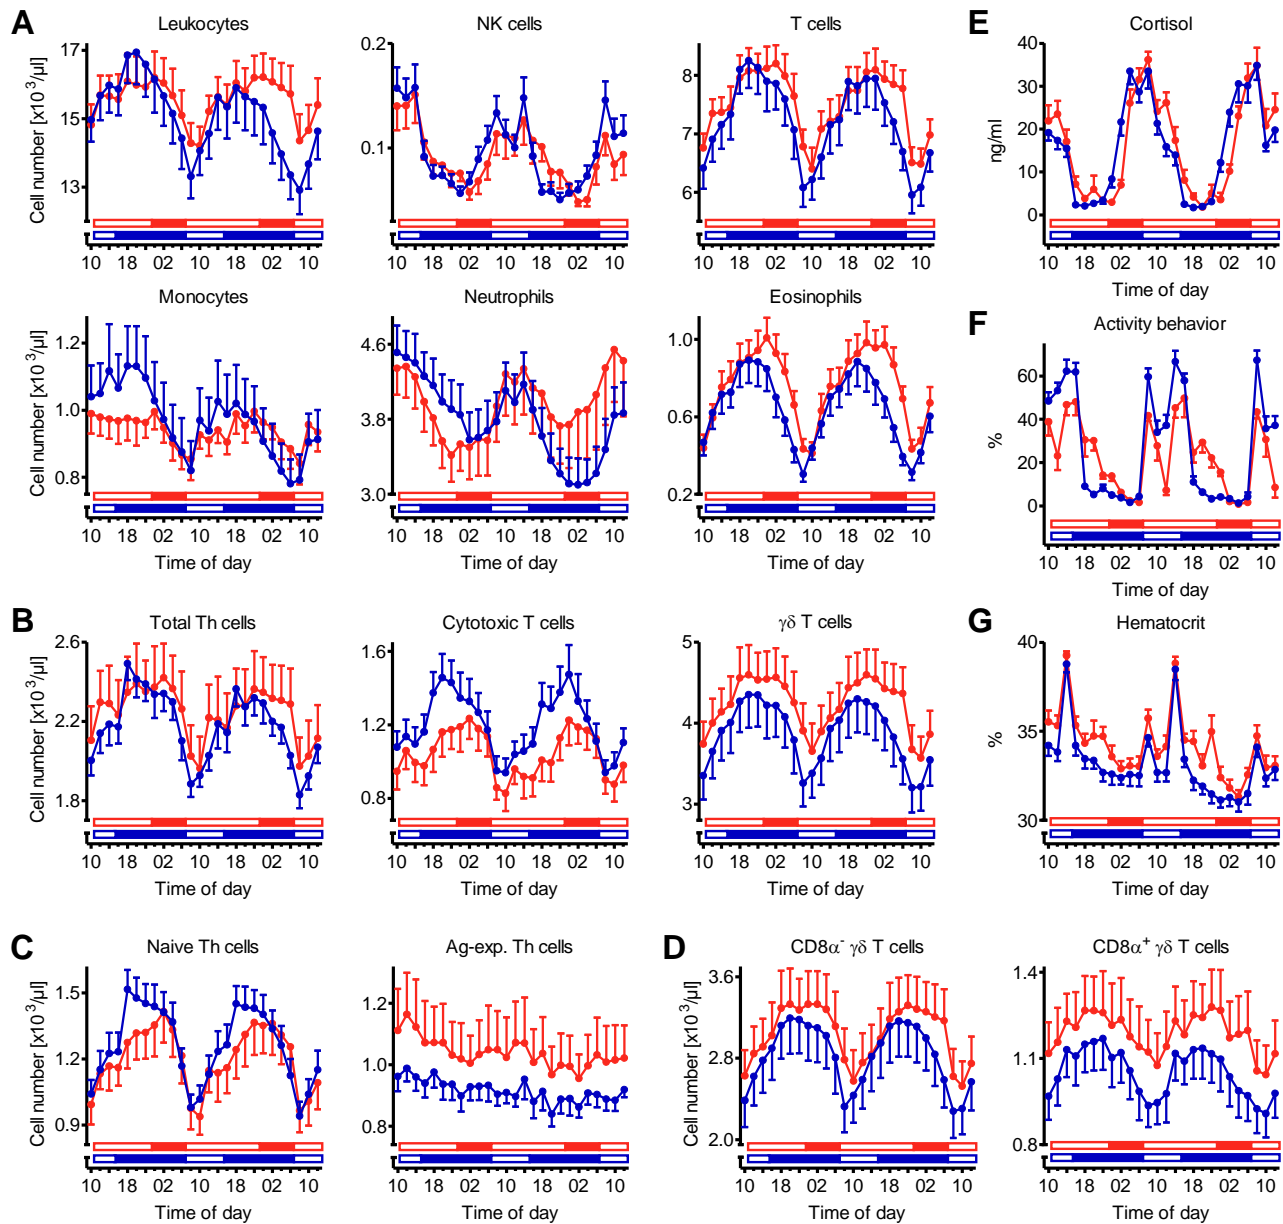

**FIGURE S5** | Diurnal profiles (mean  $\pm$  SEM) of the investigated variables in the study. Values for pigs held under long day conditions (LD n = 9) are shown in red, values for pigs held under short day conditions (SD n = 11) are shown in blue. For visual evaluation purposes, the figure illustrates the same datasets as Figure 2 in main text and Figure S4A in Supplementary Material just without the plotted cosine curves. Diurnal profiles in cell numbers in porcine blood are depicted for (A) main immune cell populations, (B) different T cell subpopulations, (C) Th cell subtypes with distinctive differentiation states, and (D) CD8 $\alpha^-$  and CD8 $\alpha^+$   $\gamma\delta$  T cells. In addition, diurnal profiles in (E) plasma cortisol concentration, (F) activity behavior (values represent the proportion of time, in which the animals were active within the two-hour interval preceding blood sampling), and (G) hematocrit are shown.

**TABLE S1** | Results of individual cosinor analyses per animal

| Variable                                          | Treatment | n <sup>a</sup> | Prop. <sup>b</sup> | Mesor               | Amplitude          | Amplitude [%] <sup>c</sup> | Peak time <sup>d</sup> |
|---------------------------------------------------|-----------|----------------|--------------------|---------------------|--------------------|----------------------------|------------------------|
| Leukocytes [/ $\mu$ l]                            | LD        | 7              | 78%                | 16214.6 $\pm$ 615.3 | 979.7 $\pm$ 60.4   | 6.0 $\pm$ 0.3              | 21:43 $\pm$ 00:52      |
|                                                   | SD        | 11             | 100%               | 15156.1 $\pm$ 819.3 | 1380.5 $\pm$ 178.1 | 8.9 $\pm$ 0.7              | 19:02 $\pm$ 00:24      |
| NK cells [/ $\mu$ l]                              | LD        | 9              | 100%               | 91.5 $\pm$ 14.0     | 32.5 $\pm$ 7.0     | 33.6 $\pm$ 3.3             | 13:10 $\pm$ 00:23      |
|                                                   | SD        | 11             | 100%               | 93.1 $\pm$ 11.3     | 41.8 $\pm$ 5.7     | 44.2 $\pm$ 2.6             | 10:50 $\pm$ 00:14      |
| T cells [/ $\mu$ l]                               | LD        | 9              | 100%               | 7548.4 $\pm$ 308.1  | 698.6 $\pm$ 73.8   | 9.2 $\pm$ 0.9              | 22:46 $\pm$ 00:19      |
|                                                   | SD        | 11             | 100%               | 7283.3 $\pm$ 406.1  | 920.2 $\pm$ 111.9  | 12.5 $\pm$ 1.1             | 21:22 $\pm$ 00:09      |
| Monocytes [/ $\mu$ l]                             | LD        | 5              | 56%                | 915.5 $\pm$ 45.4    | 76.0 $\pm$ 8.1     | 8.3 $\pm$ 1.0              | 19:23 $\pm$ 01:19      |
|                                                   | SD        | 11             | 100%               | 968.0 $\pm$ 99.1    | 126.9 $\pm$ 19.7   | 12.9 $\pm$ 0.9             | 17:28 $\pm$ 00:29      |
| Neutrophils [/ $\mu$ l]                           | LD        | 9              | 100%               | 3946.9 $\pm$ 379.6  | 516.1 $\pm$ 88.4   | 12.7 $\pm$ 1.2             | 12:15 $\pm$ 00:45      |
|                                                   | SD        | 10             | 91%                | 3592.5 $\pm$ 248.4  | 509.9 $\pm$ 51.1   | 14.2 $\pm$ 0.9             | 13:51 $\pm$ 00:25      |
| Eosinophils [/ $\mu$ l]                           | LD        | 9              | 100%               | 770.9 $\pm$ 82.9    | 247.2 $\pm$ 23.1   | 32.8 $\pm$ 1.7             | 22:03 $\pm$ 00:17      |
|                                                   | SD        | 11             | 100%               | 658.7 $\pm$ 86.5    | 252.9 $\pm$ 37.1   | 37.8 $\pm$ 1.8             | 19:51 $\pm$ 00:10      |
| Total Th cells [/ $\mu$ l]                        | LD        | 8              | 89%                | 2318.1 $\pm$ 179.1  | 176.8 $\pm$ 21.3   | 7.7 $\pm$ 0.8              | 22:02 $\pm$ 00:46      |
|                                                   | SD        | 11             | 100%               | 2187.3 $\pm$ 78.7   | 217.5 $\pm$ 23.3   | 9.8 $\pm$ 1.0              | 21:02 $\pm$ 00:15      |
| Cytotoxic T cells [/ $\mu$ l]                     | LD        | 9              | 100%               | 1055.3 $\pm$ 102.5  | 149.6 $\pm$ 20.6   | 14.0 $\pm$ 1.5             | 00:42 $\pm$ 00:23      |
|                                                   | SD        | 11             | 100%               | 1210.3 $\pm$ 101.0  | 211.2 $\pm$ 40.5   | 16.7 $\pm$ 2.0             | 22:11 $\pm$ 00:13      |
| Total $\gamma\delta$ T cells [/ $\mu$ l]          | LD        | 9              | 100%               | 4249.4 $\pm$ 328.3  | 423.9 $\pm$ 40.6   | 10.1 $\pm$ 0.7             | 22:26 $\pm$ 00:18      |
|                                                   | SD        | 11             | 100%               | 3908.1 $\pm$ 362.1  | 502.0 $\pm$ 69.5   | 12.7 $\pm$ 1.0             | 21:07 $\pm$ 00:11      |
| Naive Th cells [/ $\mu$ l]                        | LD        | 9              | 100%               | 1216.3 $\pm$ 115.5  | 179.0 $\pm$ 21.9   | 14.5 $\pm$ 0.8             | 23:04 $\pm$ 00:25      |
|                                                   | SD        | 11             | 100%               | 1271.9 $\pm$ 79.9   | 222.4 $\pm$ 15.8   | 17.7 $\pm$ 1.1             | 21:23 $\pm$ 00:06      |
| Ag-exp. Th cells [/ $\mu$ l]                      | LD        | 6              | 67%                | 1107.6 $\pm$ 165.6  | 82.9 $\pm$ 27.8    | 7.5 $\pm$ 2.4              | 14:34 $\pm$ 01:45      |
|                                                   | SD        | 7              | 64%                | 921.1 $\pm$ 56.0    | 67.5 $\pm$ 9.4     | 7.4 $\pm$ 1.1              | 15:25 $\pm$ 02:05      |
| CD8 $\alpha^-$ $\gamma\delta$ T cells [/ $\mu$ l] | LD        | 9              | 100%               | 3058.1 $\pm$ 305.3  | 345.4 $\pm$ 34.3   | 11.5 $\pm$ 0.8             | 22:56 $\pm$ 00:13      |
|                                                   | SD        | 11             | 100%               | 2851.3 $\pm$ 311.0  | 399.5 $\pm$ 53.7   | 14.1 $\pm$ 1.1             | 21:30 $\pm$ 00:09      |
| CD8 $\alpha^+$ $\gamma\delta$ T cells [/ $\mu$ l] | LD        | 9              | 100%               | 1191.2 $\pm$ 120.6  | 104.5 $\pm$ 12.3   | 9.0 $\pm$ 0.7              | 20:07 $\pm$ 00:57      |
|                                                   | SD        | 11             | 100%               | 1056.8 $\pm$ 92.5   | 114.7 $\pm$ 16.7   | 10.9 $\pm$ 1.2             | 19:30 $\pm$ 00:30      |
| Cortisol [ng/ml]                                  | LD        | 9              | 100%               | 15.4 $\pm$ 0.9      | 14.9 $\pm$ 1.2     | 97.6 $\pm$ 6.2             | 08:19 $\pm$ 00:15      |
|                                                   | SD        | 11             | 100%               | 15.5 $\pm$ 1.1      | 15.6 $\pm$ 1.3     | 100.0 $\pm$ 3.4            | 06:34 $\pm$ 00:12      |
| Activity behavior [%]                             | LD        | 9              | 100%               | 22.7 $\pm$ 1.4      | 16.6 $\pm$ 2.0     | 71.3 $\pm$ 5.1             | 15:12 $\pm$ 00:21      |
|                                                   | SD        | 11             | 100%               | 24.7 $\pm$ 0.8      | 28.7 $\pm$ 1.3     | 116.1 $\pm$ 2.9            | 12:33 $\pm$ 00:11      |
| Hematocrit [%]                                    | LD        | 8              | 89%                | 34.4 $\pm$ 0.4      | 1.7 $\pm$ 0.1      | 5.1 $\pm$ 0.5              | 14:51 $\pm$ 00:17      |
|                                                   | SD        | 11             | 100%               | 33.1 $\pm$ 0.4      | 1.7 $\pm$ 0.1      | 5.0 $\pm$ 0.5              | 13:36 $\pm$ 00:15      |

Values are presented as mean  $\pm$  SEM.

<sup>a</sup> Number of animals out of 9 under long day conditions (LD) or out of 11 under short day conditions (SD) with significant ( $P < 0.05$ ) diurnal rhythm in individual cosinor analyses

<sup>b</sup> Proportion of animals displaying diurnal rhythmicity

<sup>c</sup> Relative amplitude (amplitude/mesor)

<sup>d</sup> Time of day  $\pm$  hh:mm

**TABLE S2** | Results of generalized linear mixed model analyses<sup>a</sup>

| Variable                 | Model term                                      | Fixed coefficient $\pm$ SE | $df^b$   | $F$     | $P$                     |
|--------------------------|-------------------------------------------------|----------------------------|----------|---------|-------------------------|
| Leukocytes <sup>c</sup>  | <i>Corrected model</i> (Coefficient: Intercept) | 9.2278 $\pm$ 0.0646        | 7,512.00 | 31.86   | $<1.00 \times 10^{-36}$ |
|                          | Treatment (LD)                                  | 0.0227 $\pm$ 0.0680        | 1,18.01  | 0.11    | 0.742                   |
|                          | Light (off)                                     | 0.0228 $\pm$ 0.0065        | 1,492.94 | 12.25   | $5.07 \times 10^{-04}$  |
|                          | Feeding (yes)                                   | -0.0233 $\pm$ 0.0066       | 1,445.61 | 12.34   | $4.89 \times 10^{-04}$  |
|                          | Cortisol (per 1 ng/ml)                          | -0.0009 $\pm$ 0.0002       | 1,482.21 | 20.61   | $7.13 \times 10^{-06}$  |
|                          | Activity (per 1%)                               | -0.0008 $\pm$ 0.0001       | 1,415.21 | 71.21   | $4.44 \times 10^{-16}$  |
|                          | Hematocrit (per 1%)                             | 0.0127 $\pm$ 0.0013        | 1,426.69 | 97.29   | $<1.00 \times 10^{-36}$ |
|                          | Sampling (per sample)                           | -0.0011 $\pm$ 0.0008       | 1,42.67  | 1.79    | 0.189                   |
| NK cells <sup>c</sup>    | <i>Corrected model</i> (Coefficient: Intercept) | 2.8140 $\pm$ 0.2831        | 7,512.00 | 82.19   | $<1.00 \times 10^{-36}$ |
|                          | Treatment (LD)                                  | -0.1151 $\pm$ 0.1808       | 1,18.07  | 0.41    | 0.532                   |
|                          | Light (off)                                     | -0.2433 $\pm$ 0.0313       | 1,399.94 | 60.57   | $6.13 \times 10^{-14}$  |
|                          | Feeding (yes)                                   | -0.0915 $\pm$ 0.0379       | 1,424.12 | 5.82    | 0.016                   |
|                          | Cortisol (per 1 ng/ml)                          | 0.0083 $\pm$ 0.0010        | 1,339.90 | 75.02   | $2.22 \times 10^{-16}$  |
|                          | Activity (per 1%)                               | 0.0031 $\pm$ 0.0006        | 1,424.25 | 30.34   | $6.29 \times 10^{-08}$  |
|                          | Hematocrit (per 1%)                             | 0.0500 $\pm$ 0.0073        | 1,478.84 | 46.91   | $2.28 \times 10^{-11}$  |
|                          | Sampling (per sample)                           | -0.0077 $\pm$ 0.0020       | 1,114.16 | 14.38   | $2.41 \times 10^{-04}$  |
| T cells <sup>c</sup>     | <i>Corrected model</i> (Coefficient: Intercept) | 8.4669 $\pm$ 0.0768        | 7,512.00 | 51.15   | $<1.00 \times 10^{-36}$ |
|                          | Treatment (LD)                                  | 0.0485 $\pm$ 0.0711        | 1,18.05  | 0.46    | 0.504                   |
|                          | Light (off)                                     | 0.0712 $\pm$ 0.0084        | 1,490.35 | 71.68   | $2.22 \times 10^{-16}$  |
|                          | Feeding (yes)                                   | -0.0038 $\pm$ 0.0088       | 1,435.32 | 0.19    | 0.664                   |
|                          | Cortisol (per 1 ng/ml)                          | -0.0012 $\pm$ 0.0003       | 1,494.34 | 21.04   | $5.70 \times 10^{-06}$  |
|                          | Activity (per 1%)                               | -0.0015 $\pm$ 0.0001       | 1,396.37 | 129.49  | $<1.00 \times 10^{-36}$ |
|                          | Hematocrit (per 1%)                             | 0.0127 $\pm$ 0.0017        | 1,417.97 | 55.35   | $5.78 \times 10^{-13}$  |
|                          | Sampling (per sample)                           | -0.0008 $\pm$ 0.0008       | 1,48.80  | 0.95    | 0.334                   |
| Monocytes <sup>c</sup>   | <i>Corrected model</i> (Coefficient: Intercept) | 6.2428 $\pm$ 0.1308        | 7,512.00 | 19.26   | $<1.00 \times 10^{-36}$ |
|                          | Treatment (LD)                                  | 0.0054 $\pm$ 0.1426        | 1,18.00  | $<0.01$ | 0.970                   |
|                          | Light (off)                                     | -0.0160 $\pm$ 0.0123       | 1,484.10 | 1.69    | 0.194                   |
|                          | Feeding (yes)                                   | -0.0787 $\pm$ 0.0130       | 1,443.07 | 36.69   | $2.96 \times 10^{-09}$  |
|                          | Cortisol (per 1 ng/ml)                          | -0.0018 $\pm$ 0.0004       | 1,491.91 | 21.83   | $3.84 \times 10^{-06}$  |
|                          | Activity (per 1%)                               | -0.0006 $\pm$ 0.0002       | 1,409.84 | 9.54    | 0.002                   |
|                          | Hematocrit (per 1%)                             | 0.0205 $\pm$ 0.0025        | 1,432.09 | 65.06   | $7.33 \times 10^{-15}$  |
|                          | Sampling (per sample)                           | -0.0038 $\pm$ 0.0011       | 1,66.93  | 11.53   | 0.001                   |
| Neutrophils <sup>d</sup> | <i>Corrected model</i> (Coefficient: Intercept) | 7.8673 $\pm$ 0.1102        | 7,512.00 | 13.63   | $3.33 \times 10^{-16}$  |
|                          | Treatment (LD)                                  | 0.0461 $\pm$ 0.1197        | 1,17.89  | 0.15    | 0.705                   |
|                          | Light (off)                                     | -0.0536 $\pm$ 0.0106       | 1,480.00 | 25.36   | $6.75 \times 10^{-07}$  |
|                          | Feeding (yes)                                   | -0.0687 $\pm$ 0.0109       | 1,460.62 | 39.54   | $7.49 \times 10^{-10}$  |
|                          | Cortisol (per 1 ng/ml)                          | -0.0005 $\pm$ 0.0003       | 1,465.15 | 2.65    | 0.104                   |
|                          | Activity (per 1%)                               | 0.0004 $\pm$ 0.0002        | 1,439.91 | 7.37    | 0.007                   |
|                          | Hematocrit (per 1%)                             | 0.0133 $\pm$ 0.0021        | 1,452.83 | 40.63   | $4.53 \times 10^{-10}$  |
|                          | Sampling (per sample)                           | -0.0041 $\pm$ 0.0020       | 1,28.65  | 4.30    | 0.047                   |
| Eosinophils <sup>e</sup> | <i>Corrected model</i> (Coefficient: Intercept) | -50.46 $\pm$ 105.91        | 7,71.39  | 20.40   | $8.99 \times 10^{-15}$  |
|                          | Treatment (LD)                                  | 64.65 $\pm$ 82.36          | 1,14.54  | 0.62    | 0.445                   |
|                          | Light (off)                                     | 87.41 $\pm$ 15.94          | 1,286.45 | 30.06   | $9.20 \times 10^{-08}$  |
|                          | Feeding (yes)                                   | -49.10 $\pm$ 13.96         | 1,502.95 | 12.37   | $4.75 \times 10^{-04}$  |
|                          | Cortisol (per 1 ng/ml)                          | -3.12 $\pm$ 0.45           | 1,251.12 | 47.45   | $4.52 \times 10^{-11}$  |
|                          | Activity (per 1%)                               | -1.16 $\pm$ 0.22           | 1,425.58 | 29.22   | $1.08 \times 10^{-07}$  |
|                          | Hematocrit (per 1%)                             | 18.75 $\pm$ 2.78           | 1,346.86 | 45.39   | $6.72 \times 10^{-11}$  |
|                          | Sampling (per sample)                           | 2.55 $\pm$ 1.36            | 1,117.19 | 3.53    | 0.063                   |



TABLE S2 | (continued)

| Variable                                           | Model term                                      | Fixed coefficient $\pm$ SE | $df^b$   | $F$    | $P$                     |
|----------------------------------------------------|-------------------------------------------------|----------------------------|----------|--------|-------------------------|
| Total Th cells <sup>f</sup>                        | <i>Corrected model</i> (Coefficient: Intercept) | 1352.46 $\pm$ 202.29       | 7,82.56  | 32.69  | $<1.00 \times 10^{-36}$ |
|                                                    | Treatment (LD)                                  | 57.94 $\pm$ 177.13         | 1,18.06  | 0.11   | 0.747                   |
|                                                    | Light (off)                                     | 110.05 $\pm$ 21.39         | 1,449.23 | 26.46  | $4.03 \times 10^{-07}$  |
|                                                    | Feeding (yes)                                   | -7.59 $\pm$ 23.93          | 1,435.16 | 0.10   | 0.751                   |
|                                                    | Cortisol (per 1 ng/ml)                          | -3.00 $\pm$ 0.66           | 1,442.87 | 20.37  | $8.20 \times 10^{-06}$  |
|                                                    | Activity (per 1%)                               | -3.38 $\pm$ 0.36           | 1,409.43 | 89.67  | $<1.00 \times 10^{-36}$ |
|                                                    | Hematocrit (per 1%)                             | 28.33 $\pm$ 4.67           | 1,446.79 | 36.81  | $2.78 \times 10^{-09}$  |
|                                                    | Sampling (per sample)                           | -3.59 $\pm$ 1.63           | 1,88.38  | 4.86   | 0.030                   |
| Cytotoxic T cells <sup>d</sup>                     | <i>Corrected model</i> (Coefficient: Intercept) | 6.7845 $\pm$ 0.1351        | 7,512.00 | 38.51  | $<1.00 \times 10^{-36}$ |
|                                                    | Treatment (LD)                                  | -0.1214 $\pm$ 0.1140       | 1,17.87  | 1.13   | 0.301                   |
|                                                    | Light (off)                                     | 0.1012 $\pm$ 0.0152        | 1,450.62 | 44.55  | $7.32 \times 10^{-11}$  |
|                                                    | Feeding (yes)                                   | -0.0046 $\pm$ 0.0164       | 1,434.37 | 0.08   | 0.780                   |
|                                                    | Cortisol (per 1 ng/ml)                          | -0.0012 $\pm$ 0.0005       | 1,461.24 | 6.77   | 0.010                   |
|                                                    | Activity (per 1%)                               | -0.0023 $\pm$ 0.0002       | 1,399.86 | 89.68  | $<1.00 \times 10^{-36}$ |
|                                                    | Hematocrit (per 1%)                             | 0.0093 $\pm$ 0.0032        | 1,443.22 | 8.62   | 0.003                   |
|                                                    | Sampling (per sample)                           | -0.0020 $\pm$ 0.0012       | 1,84.02  | 3.12   | 0.081                   |
| Total $\gamma\delta$ T cells <sup>c</sup>          | <i>Corrected model</i> (Coefficient: Intercept) | 7.7475 $\pm$ 0.1097        | 7,512.00 | 38.64  | $<1.00 \times 10^{-36}$ |
|                                                    | Treatment (LD)                                  | 0.1160 $\pm$ 0.1302        | 1,18.02  | 0.79   | 0.385                   |
|                                                    | Light (off)                                     | 0.0801 $\pm$ 0.0091        | 1,482.82 | 76.57  | $<1.00 \times 10^{-36}$ |
|                                                    | Feeding (yes)                                   | -0.0027 $\pm$ 0.0097       | 1,425.04 | 0.08   | 0.782                   |
|                                                    | Cortisol (per 1 ng/ml)                          | -0.0013 $\pm$ 0.0003       | 1,492.50 | 21.84  | $3.82 \times 10^{-06}$  |
|                                                    | Activity (per 1%)                               | -0.0012 $\pm$ 0.0001       | 1,383.31 | 68.81  | $1.78 \times 10^{-15}$  |
|                                                    | Hematocrit (per 1%)                             | 0.0141 $\pm$ 0.0019        | 1,409.08 | 56.13  | $4.23 \times 10^{-13}$  |
|                                                    | Sampling (per sample)                           | -0.0005 $\pm$ 0.0009       | 1,48.30  | 0.38   | 0.542                   |
| Naive Th cells <sup>c</sup>                        | <i>Corrected model</i> (Coefficient: Intercept) | 6.5871 $\pm$ 0.1243        | 7,512.00 | 62.26  | $<1.00 \times 10^{-36}$ |
|                                                    | Treatment (LD)                                  | -0.0438 $\pm$ 0.1085       | 1,18.06  | 0.16   | 0.691                   |
|                                                    | Light (off)                                     | 0.1075 $\pm$ 0.0128        | 1,402.05 | 71.00  | $6.66 \times 10^{-16}$  |
|                                                    | Feeding (yes)                                   | -0.0054 $\pm$ 0.0148       | 1,405.23 | 0.13   | 0.717                   |
|                                                    | Cortisol (per 1 ng/ml)                          | -0.0032 $\pm$ 0.0004       | 1,364.31 | 67.52  | $3.77 \times 10^{-15}$  |
|                                                    | Activity (per 1%)                               | -0.0024 $\pm$ 0.0002       | 1,386.15 | 118.91 | $<1.00 \times 10^{-36}$ |
|                                                    | Hematocrit (per 1%)                             | 0.0174 $\pm$ 0.0029        | 1,442.55 | 36.68  | $2.97 \times 10^{-09}$  |
|                                                    | Sampling (per sample)                           | -0.0007 $\pm$ 0.0009       | 1,74.23  | 0.57   | 0.454                   |
| Ag-exp. Th cells <sup>c</sup>                      | <i>Corrected model</i> (Coefficient: Intercept) | 6.5419 $\pm$ 0.1031        | 7,512.00 | 8.32   | $1.22 \times 10^{-09}$  |
|                                                    | Treatment (LD)                                  | 0.0783 $\pm$ 0.0927        | 1,18.06  | 0.71   | 0.409                   |
|                                                    | Light (off)                                     | -0.0179 $\pm$ 0.0108       | 1,461.98 | 2.72   | 0.100                   |
|                                                    | Feeding (yes)                                   | -0.0210 $\pm$ 0.0120       | 1,445.16 | 3.05   | 0.082                   |
|                                                    | Cortisol (per 1 ng/ml)                          | 0.0007 $\pm$ 0.0003        | 1,461.39 | 3.89   | 0.049                   |
|                                                    | Activity (per 1%)                               | -0.0006 $\pm$ 0.0002       | 1,420.31 | 10.66  | 0.001                   |
|                                                    | Hematocrit (per 1%)                             | 0.0099 $\pm$ 0.0023        | 1,451.34 | 17.73  | $3.08 \times 10^{-05}$  |
|                                                    | Sampling (per sample)                           | -0.0028 $\pm$ 0.0008       | 1,97.76  | 10.53  | 0.002                   |
| CD8 $\alpha^-$ $\gamma\delta$ T cells <sup>c</sup> | <i>Corrected model</i> (Coefficient: Intercept) | 7.4562 $\pm$ 0.1299        | 7,512.00 | 45.25  | $<1.00 \times 10^{-36}$ |
|                                                    | Treatment (LD)                                  | 0.1072 $\pm$ 0.1597        | 1,18.02  | 0.45   | 0.511                   |
|                                                    | Light (off)                                     | 0.0948 $\pm$ 0.0099        | 1,464.60 | 91.01  | $<1.00 \times 10^{-36}$ |
|                                                    | Feeding (yes)                                   | -0.0059 $\pm$ 0.0107       | 1,410.83 | 0.30   | 0.583                   |
|                                                    | Cortisol (per 1 ng/ml)                          | -0.0015 $\pm$ 0.0003       | 1,477.62 | 23.73  | $1.51 \times 10^{-06}$  |
|                                                    | Activity (per 1%)                               | -0.0014 $\pm$ 0.0002       | 1,366.67 | 74.84  | $2.22 \times 10^{-16}$  |
|                                                    | Hematocrit (per 1%)                             | 0.0128 $\pm$ 0.0021        | 1,401.26 | 37.55  | $2.13 \times 10^{-09}$  |
|                                                    | Sampling (per sample)                           | -0.0005 $\pm$ 0.0009       | 1,47.08  | 0.36   | 0.551                   |

TABLE S2 | (continued)

| Variable                                           | Model term                                      | Fixed coefficient $\pm$ SE | $df^b$   | $F$   | $P$                    |
|----------------------------------------------------|-------------------------------------------------|----------------------------|----------|-------|------------------------|
| CD8 $\alpha^+$ $\gamma\delta$ T cells <sup>f</sup> | <i>Corrected model</i> (Coefficient: Intercept) | 475.23 $\pm$ 135.74        | 7,81.83  | 16.38 | $2.65 \times 10^{-13}$ |
|                                                    | Treatment (LD)                                  | 129.60 $\pm$ 142.34        | 1,18.02  | 0.83  | 0.375                  |
|                                                    | Light (off)                                     | 56.78 $\pm$ 12.87          | 1,465.45 | 19.47 | $1.27 \times 10^{-05}$ |
|                                                    | Feeding (yes)                                   | 11.02 $\pm$ 14.08          | 1,440.03 | 0.61  | 0.434                  |
|                                                    | Cortisol (per 1 ng/ml)                          | -1.83 $\pm$ 0.40           | 1,469.84 | 20.93 | $6.10 \times 10^{-06}$ |
|                                                    | Activity (per 1%)                               | -0.90 $\pm$ 0.21           | 1,410.79 | 18.43 | $2.20 \times 10^{-05}$ |
|                                                    | Hematocrit (per 1%)                             | 18.23 $\pm$ 2.75           | 1,440.69 | 43.93 | $9.95 \times 10^{-11}$ |
|                                                    | Sampling (per sample)                           | -1.07 $\pm$ 1.05           | 1,82.33  | 1.04  | 0.310                  |

<sup>a</sup>  $y_{ij} = \mu + \text{treatment}_i + \text{light}_{ij} + \text{concentrate feeding}_j + \text{plasma cortisol concentration}_{ij} + \text{relative activity behavior}_{ij} + \text{hematocrit}_{ij} + \text{sampling}_j + \text{animal identity}_i + \epsilon_{ij}$ ; dependent variable:  $y_{ij}$  (cell number/ $\mu$ l blood) for an animal  $i$  at sampling  $j$ ; fixed effects: intercept  $\mu$ , treatment (LD/SD), light (off/on), concentrate feeding (yes/no), plasma cortisol concentration (ng/ml), relative activity behavior (%), hematocrit (%), and sampling (1–26); random effect (with scaled identity (ID) covariance structure): animal identity ( $n = 20$ ); repeated effect (with first order autoregressive (AR(1)) residual ( $\epsilon_{ij}$ ) covariance structure): sampling; subject: animal identity

<sup>b</sup> Numerator degrees of freedom, denominator degrees of freedom

<sup>c</sup> Gamma distribution with log link function

<sup>d</sup> Inverse Gaussian distribution with log link function

<sup>e</sup> Inverse Gaussian distribution with identity link function

<sup>f</sup> Normal distribution with identity link function

**TABLE S3** | Results of overall cosinor analyses for CD8 $\alpha^-$  and CD8 $\alpha^+$   $\gamma\delta$  T cells with combined datasets of all animals held under long day conditions (LD, n = 9) or short day conditions (SD, n = 11)

| Variable                                         | Treatment | $P^a$  | Mesor             | Amplitude        | Amplitude [%] <sup>b</sup> | Peak time <sup>c</sup> |
|--------------------------------------------------|-----------|--------|-------------------|------------------|----------------------------|------------------------|
| CD8 $\alpha^-$ $\gamma\delta$ T cells [ $\mu$ l] | LD        | <0.001 | 3058.1 $\pm$ 58.1 | 342.0 $\pm$ 79.5 | 11.2 $\pm$ 2.6             | 22:53 $\pm$ 00:57      |
|                                                  | SD        | <0.001 | 2851.3 $\pm$ 59.6 | 396.6 $\pm$ 82.5 | 13.9 $\pm$ 2.9             | 21:28 $\pm$ 00:50      |
| CD8 $\alpha^+$ $\gamma\delta$ T cells [ $\mu$ l] | LD        | 0.011  | 1191.2 $\pm$ 23.3 | 82.2 $\pm$ 32.4  | 6.9 $\pm$ 2.7              | 20:51 $\pm$ 01:33      |
|                                                  | SD        | <0.001 | 1056.8 $\pm$ 18.1 | 106.0 $\pm$ 25.6 | 10.0 $\pm$ 2.4             | 20:03 $\pm$ 00:55      |

Values are presented as mean  $\pm$  SEM.

<sup>a</sup> Significant diurnal rhythm at  $P < 0.05$

<sup>b</sup> Relative amplitude (amplitude/mesor)

<sup>c</sup> Time of day  $\pm$  hh:mm

**TABLE S4** | Summary of generalized linear mixed models for CD8 $\alpha^-$  and CD8 $\alpha^+$   $\gamma\delta$  T cells<sup>a</sup>

| Variable                              | Fixed effects: Estimated associations <sup>b</sup> with significance levels <sup>c</sup> |                |                   |                  |                  |                |                   |
|---------------------------------------|------------------------------------------------------------------------------------------|----------------|-------------------|------------------|------------------|----------------|-------------------|
|                                       | Treatment (LD)                                                                           | Light (off)    | Feeding (yes)     | Cortisol         | Activity         | Hematocrit     | Sampling          |
| CD8 $\alpha^-$ $\gamma\delta$ T cells | $\leftrightarrow$                                                                        | $\uparrow$ *** | $\leftrightarrow$ | $\downarrow$ *** | $\downarrow$ *** | $\uparrow$ *** | $\leftrightarrow$ |
| CD8 $\alpha^+$ $\gamma\delta$ T cells | $\leftrightarrow$                                                                        | $\uparrow$ *** | $\leftrightarrow$ | $\downarrow$ *** | $\downarrow$ *** | $\uparrow$ *** | $\leftrightarrow$ |

<sup>a</sup> Refer to Table S2 in Supplementary Material for details.

<sup>b</sup> Estimated association:  $\uparrow$  positive,  $\downarrow$  negative,  $\leftrightarrow$  none

<sup>c</sup> \*\*\*  $P < 0.001$

**TABLE S5** | Statistical details for pairwise comparisons of mesor values of the investigated variables between animals held under long day conditions (LD) or short day conditions (SD)

| Variable                                                       | Treatment | n <sup>a</sup> | Statistics                     | Mean difference<br>± SEM | CI <sup>b</sup> or Pctl <sup>c</sup> |
|----------------------------------------------------------------|-----------|----------------|--------------------------------|--------------------------|--------------------------------------|
| Leukocytes [/ $\mu$ l] <sup>d</sup>                            | LD        | 7              | $t(16) = 0.92, P = 0.369$      | $1058.4 \pm 1145.1$      | CI 14709.0–17720.1                   |
|                                                                | SD        | 11             |                                |                          | CI 13330.6–16981.7                   |
| NK cells [/ $\mu$ l] <sup>e</sup>                              | LD        | 9              | $U = 43, Z = -0.49, P = 0.621$ | $-1.6 \pm 17.8$          | Pctl 64.8–122.4                      |
|                                                                | SD        | 11             |                                |                          | Pctl 66.9–123.6                      |
| T cells [/ $\mu$ l] <sup>d</sup>                               | LD        | 9              | $t(18) = 0.50, P = 0.623$      | $265.1 \pm 529.4$        | CI 6838.0–8258.9                     |
|                                                                | SD        | 11             |                                |                          | CI 6378.5–8188.1                     |
| Monocytes [/ $\mu$ l] <sup>d</sup>                             | LD        | 5              | $t(14) = -0.34, P = 0.736$     | $-52.5 \pm 152.6$        | CI 789.4–1041.6                      |
|                                                                | SD        | 11             |                                |                          | CI 747.2–1188.7                      |
| Neutrophils [/ $\mu$ l] <sup>d</sup>                           | LD        | 9              | $t(17) = 0.80, P = 0.437$      | $354.4 \pm 444.8$        | CI 3071.5–4822.3                     |
|                                                                | SD        | 10             |                                |                          | CI 3030.5–4154.5                     |
| Eosinophils [/ $\mu$ l] <sup>d</sup>                           | LD        | 9              | $t(18) = 0.92, P = 0.368$      | $112.2 \pm 121.6$        | CI 579.9–962.0                       |
|                                                                | SD        | 11             |                                |                          | CI 466.0–851.4                       |
| Total Th cells [/ $\mu$ l] <sup>e</sup>                        | LD        | 8              | $U = 42, Z = -0.17, P = 0.869$ | $130.8 \pm 177.4$        | Pctl 1903.8–2828.3                   |
|                                                                | SD        | 11             |                                |                          | Pctl 2002.0–2327.7                   |
| Cytotoxic T cells [/ $\mu$ l] <sup>e</sup>                     | LD        | 9              | $U = 33, Z = -1.25, P = 0.210$ | $-155.0 \pm 145.2$       | Pctl 858.1–1112.1                    |
|                                                                | SD        | 11             |                                |                          | Pctl 973.2–1541.7                    |
| Total $\gamma\delta$ T cells [/ $\mu$ l] <sup>d</sup>          | LD        | 9              | $t(18) = 0.68, P = 0.503$      | $341.3 \pm 499.0$        | CI 3492.3–5006.5                     |
|                                                                | SD        | 11             |                                |                          | CI 3101.3–4714.9                     |
| Naive Th cells [/ $\mu$ l] <sup>e</sup>                        | LD        | 9              | $U = 35, Z = -1.10, P = 0.271$ | $-55.5 \pm 136.6$        | Pctl 977.5–1360.8                    |
|                                                                | SD        | 11             |                                |                          | Pctl 998.9–1503.8                    |
| Ag-exp. Th cells [/ $\mu$ l] <sup>e</sup>                      | LD        | 6              | $U = 13, Z = -1.14, P = 0.253$ | $186.4 \pm 163.9$        | Pctl 907.0–1264.1                    |
|                                                                | SD        | 7              |                                |                          | Pctl 840.9–1003.1                    |
| CD8 $\alpha^-$ $\gamma\delta$ T cells [/ $\mu$ l] <sup>d</sup> | LD        | 9              | $t(18) = 0.47, P = 0.645$      | $206.8 \pm 441.3$        | CI 2354.0–3762.3                     |
|                                                                | SD        | 11             |                                |                          | CI 2158.3–3544.3                     |
| CD8 $\alpha^+$ $\gamma\delta$ T cells [/ $\mu$ l] <sup>d</sup> | LD        | 9              | $t(18) = 0.90, P = 0.380$      | $134.5 \pm 149.4$        | CI 913.1–1469.3                      |
|                                                                | SD        | 11             |                                |                          | CI 850.6–1262.9                      |
| Cortisol [ng/ml] <sup>d</sup>                                  | LD        | 9              | $t(18) = -0.10, P = 0.921$     | $-0.1 \pm 1.5$           | CI 13.4–17.4                         |
|                                                                | SD        | 11             |                                |                          | CI 13.0–18.1                         |
| Activity behavior [%] <sup>f</sup>                             | LD        | 9              | $t(13.19) = -1.24., P = 0.236$ | $-2.0 \pm 1.6$           | CI 19.6–25.9                         |
|                                                                | SD        | 11             |                                |                          | CI 22.9–26.5                         |
| Hematocrit [%] <sup>d</sup>                                    | LD        | 8              | $t(17) = 2.28., P = 0.036$     | $1.3 \pm 0.6$            | CI 33.6–35.2                         |
|                                                                | SD        | 11             |                                |                          | CI 32.1–34.0                         |

<sup>a</sup> Number of animals out of 9 for LD or out of 11 for SD, which were included into pairwise comparisons (animals with significant ( $P < 0.05$ ) diurnal rhythm in individual cosinor analyses, refer to Table S1 in Supplementary Material)

<sup>b</sup> 95% confidence interval

<sup>c</sup> 25th–75th percentile

<sup>d</sup> Unpaired Student's  $t$ -test (two-tailed)

<sup>e</sup> Mann-Whitney  $U$  test (two-tailed)

<sup>f</sup> Unequal variance  $t$ -test (two-tailed)

**TABLE S6** | Statistical details for pairwise comparisons of relative amplitudes of the investigated variables between animals held under long day conditions (LD) or short day conditions (SD)

| Variable                                                       | Treatment | n <sup>a</sup> | Statistics                                | Mean difference<br>± SEM [%] | CI <sup>b</sup> or Pctl <sup>c</sup> [%] |
|----------------------------------------------------------------|-----------|----------------|-------------------------------------------|------------------------------|------------------------------------------|
| Leukocytes [/ $\mu$ l] <sup>e</sup>                            | LD        | 7              | $U = 4, Z = -3.13, P = 0.002$             | $-2.9 \pm 0.9$               | Pctl 5.5–6.8                             |
|                                                                | SD        | 11             |                                           |                              | Pctl 7.7–9.0                             |
| NK cells [/ $\mu$ l] <sup>d</sup>                              | LD        | 9              | $t(18) = -2.54, P = 0.021$                | $-10.6 \pm 4.2$              | CI 26.1–41.2                             |
|                                                                | SD        | 11             |                                           |                              | CI 38.3–50.1                             |
| T cells [/ $\mu$ l] <sup>e</sup>                               | LD        | 9              | $U = 19, Z = -2.32, P = 0.020$            | $-3.3 \pm 1.4$               | Pctl 7.2–11.2                            |
|                                                                | SD        | 11             |                                           |                              | Pctl 10.5–13.4                           |
| Monocytes [/ $\mu$ l] <sup>d</sup>                             | LD        | 5              | $t(14) = -3.14, P = 0.007$                | $-4.6 \pm 1.5$               | CI 5.7–11.0                              |
|                                                                | SD        | 11             |                                           |                              | CI 11.0–14.9                             |
| Neutrophils [/ $\mu$ l] <sup>d</sup>                           | LD        | 9              | $t(17) = -0.96, P = 0.348$                | $-1.5 \pm 1.5$               | CI 9.9–15.6                              |
|                                                                | SD        | 10             |                                           |                              | CI 12.1–16.3                             |
| Eosinophils [/ $\mu$ l] <sup>e</sup>                           | LD        | 9              | $U = 26, Z = -1.79, P = 0.074$            | $-5.0 \pm 2.5$               | Pctl 27.9–35.4                           |
|                                                                | SD        | 11             |                                           |                              | Pctl 32.8–41.1                           |
| Total Th cells [/ $\mu$ l] <sup>d</sup>                        | LD        | 8              | $t(17) = -1.61, P = 0.126$                | $-2.1 \pm 1.3$               | CI 5.8–9.6                               |
|                                                                | SD        | 11             |                                           |                              | CI 7.7–12.0                              |
| Cytotoxic T cells [/ $\mu$ l] <sup>d</sup>                     | LD        | 9              | $t(18) = -1.02, P = 0.320$                | $-2.6 \pm 2.6$               | CI 10.6–17.5                             |
|                                                                | SD        | 11             |                                           |                              | CI 12.3–21.0                             |
| Total $\gamma\delta$ T cells [/ $\mu$ l] <sup>d</sup>          | LD        | 9              | $t(18) = -2.02, P = 0.058$                | $-2.6 \pm 1.3$               | CI 8.4–11.7                              |
|                                                                | SD        | 11             |                                           |                              | CI 10.4–15.0                             |
| Naive Th cells [/ $\mu$ l] <sup>e</sup>                        | LD        | 9              | $U = 20, Z = -2.24, P = 0.025$            | $-3.2 \pm 1.4$               | Pctl 12.6–16.6                           |
|                                                                | SD        | 11             |                                           |                              | Pctl 15.4–18.0                           |
| Ag-exp. Th cells [/ $\mu$ l] <sup>e</sup>                      | LD        | 6              | $U = 16, Z = -0.71, P = 0.475$            | $0.1 \pm 2.5$                | Pctl 4.0–12.3                            |
|                                                                | SD        | 7              |                                           |                              | Pctl 5.3–10.3                            |
| CD8 $\alpha^-$ $\gamma\delta$ T cells [/ $\mu$ l] <sup>d</sup> | LD        | 9              | $t(18) = -1.87, P = 0.078$                | $-2.6 \pm 1.4$               | CI 9.8–13.3                              |
|                                                                | SD        | 11             |                                           |                              | CI 11.7–16.5                             |
| CD8 $\alpha^+$ $\gamma\delta$ T cells [/ $\mu$ l] <sup>d</sup> | LD        | 9              | $t(18) = -1.34, P = 0.197$                | $-1.9 \pm 1.4$               | CI 7.4–10.5                              |
|                                                                | SD        | 11             |                                           |                              | CI 8.3–13.5                              |
| Cortisol [ng/ml] <sup>e</sup>                                  | LD        | 9              | $U = 43, Z = -0.49, P = 0.621$            | $-2.4 \pm 6.8$               | Pctl 84.7–108.7                          |
|                                                                | SD        | 11             |                                           |                              | Pctl 94.8–108.1                          |
| Activity behavior [%] <sup>d</sup>                             | LD        | 9              | $t(18) = -8.03, P = 2.32 \times 10^{-07}$ | $-44.8 \pm 5.6$              | CI 59.6–82.9                             |
|                                                                | SD        | 11             |                                           |                              | CI 109.6–122.6                           |
| Hematocrit [%] <sup>d</sup>                                    | LD        | 8              | $t(17) = 0.13, P = 0.902$                 | $0.1 \pm 0.7$                | CI 4.0–6.2                               |
|                                                                | SD        | 11             |                                           |                              | CI 4.0–6.0                               |

<sup>a</sup> Number of animals out of 9 for LD or out of 11 for SD, which were included into pairwise comparisons (animals with significant ( $P < 0.05$ ) diurnal rhythm in individual cosinor analyses, refer to Table S1 in Supplementary Material)

<sup>b</sup> 95% confidence interval

<sup>c</sup> 25th–75th percentile

<sup>d</sup> Unpaired Student's  $t$ -test (two-tailed)

<sup>e</sup> Mann-Whitney  $U$  test (two-tailed)

**TABLE S7** | Statistical details for pairwise comparisons of peak times of the investigated variables between animals held under long day conditions (LD) or short day conditions (SD)

| Variable                                                       | Treatment | n <sup>a</sup> | Statistics                                   | Mean difference<br>± SEM [hh:mm] | CI <sup>b</sup> or Pctl <sup>c</sup><br>[time of day] | StdDev <sup>g</sup><br>[hh:mm] |
|----------------------------------------------------------------|-----------|----------------|----------------------------------------------|----------------------------------|-------------------------------------------------------|--------------------------------|
| Leukocytes [/ $\mu$ l] <sup>d</sup>                            | LD        | 7              | $t(16) = 3.17, P = 0.006$                    | 02:42 ± 00:51                    | CI 19:35–23:51                                        | 02:18                          |
|                                                                | SD        | 11             |                                              |                                  | CI 18:08–19:55                                        | 01:20                          |
| NK cells [/ $\mu$ l] <sup>d</sup>                              | LD        | 9              | $t(18) = 5.41, P = 3.85 \times 10^{-05}$     | 02:20 ± 00:26                    | CI 12:17–14:03                                        | 01:09                          |
|                                                                | SD        | 11             |                                              |                                  | CI 10:19–11:21                                        | 00:46                          |
| T cells [/ $\mu$ l] <sup>f</sup>                               | LD        | 9              | $t(11.33) = 4.03, P = 0.002$                 | 01:24 ± 00:21                    | CI 22:02–23:29                                        | 00:57                          |
|                                                                | SD        | 11             |                                              |                                  | CI 21:02–21:41                                        | 00:29                          |
| Monocytes [/ $\mu$ l] <sup>f</sup>                             | LD        | 5              | $t(5.13) = 1.37, P = 0.229$                  | 01:55 ± 01:24                    | CI 15:44–23:02                                        | 02:56                          |
|                                                                | SD        | 11             |                                              |                                  | CI 16:23–18:33                                        | 01:37                          |
| Neutrophils [/ $\mu$ l] <sup>e</sup>                           | LD        | 9              | $U = 27, Z = -1.47, P = 0.142$               | -01:35 ± 00:50                   | Pctl 12:15–13:20                                      | 02:15                          |
|                                                                | SD        | 10             |                                              |                                  | Pctl 12:44–14:54                                      | 01:20                          |
| Eosinophils [/ $\mu$ l] <sup>d</sup>                           | LD        | 9              | $t(18) = 7.08, P = 1.34 \times 10^{-06}$     | 02:12 ± 00:19                    | CI 21:25–22:42                                        | 00:50                          |
|                                                                | SD        | 11             |                                              |                                  | CI 19:28–20:13                                        | 00:33                          |
| Total Th cells [/ $\mu$ l] <sup>d</sup>                        | LD        | 8              | $t(17) = 1.40, P = 0.179$                    | 01:00 ± 00:43                    | CI 20:12–23:52                                        | 02:11                          |
|                                                                | SD        | 11             |                                              |                                  | CI 20:29–21:34                                        | 00:48                          |
| Cytotoxic T cells [/ $\mu$ l] <sup>d</sup>                     | LD        | 9              | $t(18) = 5.95, P = 1.26 \times 10^{-05}$     | 02:31 ± 00:25                    | CI 23:49–01:34                                        | 01:08                          |
|                                                                | SD        | 11             |                                              |                                  | CI 21:41–22:41                                        | 00:45                          |
| Total $\gamma\delta$ T cells [/ $\mu$ l] <sup>d</sup>          | LD        | 9              | $t(18) = 3.97, P = 8.92 \times 10^{-04}$     | 01:19 ± 00:20                    | CI 21:45–23:08                                        | 00:54                          |
|                                                                | SD        | 11             |                                              |                                  | CI 20:43–21:31                                        | 00:35                          |
| Naive Th cells [/ $\mu$ l] <sup>e</sup>                        | LD        | 9              | $U = 2, Z = -3.61, P = 3.08 \times 10^{-04}$ | 01:41 ± 00:26                    | Pctl 22:10–00:27                                      | 01:15                          |
|                                                                | SD        | 11             |                                              |                                  | Pctl 21:09–21:36                                      | 00:19                          |
| Ag-exp. Th cells [/ $\mu$ l] <sup>d</sup>                      | LD        | 6              | $t(11) = -0.30, P = 0.767$                   | -00:51 ± 02:47                   | CI 10:03–19:05                                        | 04:18                          |
|                                                                | SD        | 7              |                                              |                                  | CI 10:18–20:32                                        | 05:32                          |
| CD8 $\alpha^-$ $\gamma\delta$ T cells [/ $\mu$ l] <sup>d</sup> | LD        | 9              | $t(18) = 5.51, P = 3.12 \times 10^{-05}$     | 01:25 ± 00:16                    | CI 22:26–23:26                                        | 00:39                          |
|                                                                | SD        | 11             |                                              |                                  | CI 21:10–21:51                                        | 00:30                          |
| CD8 $\alpha^+$ $\gamma\delta$ T cells [/ $\mu$ l] <sup>d</sup> | LD        | 9              | $t(18) = 0.61, P = 0.547$                    | 00:37 ± 01:01                    | CI 17:57–22:18                                        | 02:50                          |
|                                                                | SD        | 11             |                                              |                                  | CI 18:24–20:36                                        | 01:38                          |
| Cortisol [ng/ml] <sup>d</sup>                                  | LD        | 9              | $t(18) = 5.60, P = 2.60 \times 10^{-05}$     | 01:44 ± 00:19                    | CI 07:45–08:52                                        | 00:44                          |
|                                                                | SD        | 11             |                                              |                                  | CI 06:08–07:01                                        | 00:40                          |
| Activity behavior [%] <sup>f</sup>                             | LD        | 9              | $t(12.23) = 6.86, P = 1.58 \times 10^{-05}$  | 02:39 ± 00:23                    | CI 14:25–16:00                                        | 01:02                          |
|                                                                | SD        | 11             |                                              |                                  | CI 12:09–12:57                                        | 00:36                          |
| Hematocrit [%] <sup>d</sup>                                    | LD        | 8              | $t(17) = 3.32, P = 0.004$                    | 01:16 ± 00:23                    | CI 14:11–15:32                                        | 00:48                          |
|                                                                | SD        | 11             |                                              |                                  | CI 13:03–14:09                                        | 00:49                          |

<sup>a</sup> Number of animals out of 9 for LD or out of 11 for SD, which were included into pairwise comparisons (animals with significant ( $P < 0.05$ ) diurnal rhythm in individual cosinor analyses, refer to Table S1 in Supplementary Material)

<sup>b</sup> 95% confidence interval

<sup>c</sup> 25th–75th percentile

<sup>d</sup> Unpaired Student's  $t$ -test (two-tailed)

<sup>e</sup> Mann-Whitney  $U$  test (two-tailed)

<sup>f</sup> Unequal variance  $t$ -test (two-tailed)

<sup>g</sup> Standard deviation of mean peak times to define phase distribution

**TABLE S8** | Statistical details for pairwise comparisons of mean values of the investigated variables between animals held under long day conditions (LD) or short day conditions (SD)

| Variable                                                       | Treatment | n <sup>a</sup> | Statistics                     | Mean difference<br>± SEM | CI <sup>b</sup> or Pctl <sup>c</sup> |
|----------------------------------------------------------------|-----------|----------------|--------------------------------|--------------------------|--------------------------------------|
| Leukocytes [/ $\mu$ l] <sup>d</sup>                            | LD        | 9              | $t(18) = 0.40, P = 0.693$      | $429.9 \pm 1071.9$       | CI 14032.5–17028.6                   |
|                                                                | SD        | 11             |                                |                          | CI 13298.2–16903.2                   |
| NK cells [/ $\mu$ l] <sup>e</sup>                              | LD        | 9              | $U = 43, Z = -0.49, P = 0.621$ | $-2.6 \pm 18.4$          | Pctl 65.7–125.2                      |
|                                                                | SD        | 11             |                                |                          | Pctl 68.8–126.9                      |
| T cells [/ $\mu$ l] <sup>d</sup>                               | LD        | 9              | $t(18) = 0.53, P = 0.603$      | $276.7 \pm 523.4$        | CI 6793.5–8202.4                     |
|                                                                | SD        | 11             |                                |                          | CI 6327.8–8114.6                     |
| Monocytes [/ $\mu$ l] <sup>d</sup>                             | LD        | 9              | $t(18) = -0.22, P = 0.826$     | $-26.2 \pm 117.9$        | CI 826.8–1053.5                      |
|                                                                | SD        | 11             |                                |                          | CI 747.2–1185.5                      |
| Neutrophils [/ $\mu$ l] <sup>d</sup>                           | LD        | 9              | $t(18) = 0.42, P = 0.678$      | $195.0 \pm 462.0$        | CI 3094.7–4855.8                     |
|                                                                | SD        | 11             |                                |                          | CI 3160.1–4400.5                     |
| Eosinophils [/ $\mu$ l] <sup>d</sup>                           | LD        | 9              | $t(18) = 0.91, P = 0.376$      | $108.0 \pm 119.0$        | CI 565.7–941.5                       |
|                                                                | SD        | 11             |                                |                          | CI 457.4–833.8                       |
| Total Th cells [/ $\mu$ l] <sup>e</sup>                        | LD        | 9              | $U = 42, Z = -0.57, P = 0.569$ | $69.0 \pm 176.1$         | Pctl 1873.5–2615.2                   |
|                                                                | SD        | 11             |                                |                          | Pctl 1978.6–2314.6                   |
| Cytotoxic T cells [/ $\mu$ l] <sup>e</sup>                     | LD        | 9              | $U = 33, Z = -1.25, P = 0.210$ | $-149.7 \pm 142.4$       | Pctl 854.4–1098.3                    |
|                                                                | SD        | 11             |                                |                          | Pctl 967.5–1522.5                    |
| Total $\gamma\delta$ T cells [/ $\mu$ l] <sup>d</sup>          | LD        | 9              | $t(18) = 0.69, P = 0.496$      | $343.5 \pm 494.7$        | CI 3466.4–4971.2                     |
|                                                                | SD        | 11             |                                |                          | CI 3076.3–4674.3                     |
| Naive Th cells [/ $\mu$ l] <sup>e</sup>                        | LD        | 9              | $U = 35, Z = -1.10, P = 0.271$ | $-53.3 \pm 135.1$        | Pctl 969.4–1345.6                    |
|                                                                | SD        | 11             |                                |                          | Pctl 983.1–1490.0                    |
| Ag-exp. Th cells [/ $\mu$ l] <sup>e</sup>                      | LD        | 9              | $U = 37, Z = -0.95, P = 0.342$ | $122.3 \pm 112.8$        | Pctl 836.7–1032.7                    |
|                                                                | SD        | 11             |                                |                          | Pctl 825.4–999.1                     |
| CD8 $\alpha^-$ $\gamma\delta$ T cells [/ $\mu$ l] <sup>d</sup> | LD        | 9              | $t(18) = 0.48, P = 0.640$      | $208.6 \pm 437.9$        | CI 2333.4–3732.1                     |
|                                                                | SD        | 11             |                                |                          | CI 2137.1–3511.3                     |
| CD8 $\alpha^+$ $\gamma\delta$ T cells [/ $\mu$ l] <sup>d</sup> | LD        | 9              | $t(18) = 0.91, P = 0.374$      | $134.9 \pm 148.1$        | CI 910.2–1461.9                      |
|                                                                | SD        | 11             |                                |                          | CI 846.9–1255.3                      |
| Cortisol [ng/ml] <sup>d</sup>                                  | LD        | 9              | $t(18) = 0.16, P = 0.879$      | $0.2 \pm 1.5$            | CI 14.1–18.3                         |
|                                                                | SD        | 11             |                                |                          | CI 13.4–18.6                         |
| Activity behavior [%] <sup>f</sup>                             | LD        | 9              | $t(13.42) = -1.89, P = 0.081$  | $-3.3 \pm 1.8$           | CI 19.9–26.8                         |
|                                                                | SD        | 11             |                                |                          | CI 24.6–28.6                         |
| Hematocrit [%] <sup>d</sup>                                    | LD        | 9              | $t(18) = 1.82, P = 0.085$      | $1.1 \pm 0.6$            | CI 33.3–35.1                         |
|                                                                | SD        | 11             |                                |                          | CI 32.2–34.1                         |

<sup>a</sup> Data of all animals per treatment were included in comparisons.<sup>b</sup> 95% confidence interval<sup>c</sup> 25th–75th percentile<sup>d</sup> Unpaired Student's *t*-test (two-tailed)<sup>e</sup> Mann-Whitney *U* test (two-tailed)<sup>f</sup> Unequal variance *t*-test (two-tailed)

**TABLE S9** | Statistical details for mixed ANOVA investigating the effects of treatment (long day conditions (LD)/short day conditions (SD)) and light (on/off)<sup>a</sup>

| Variable              | Model term                  | Pairwise comparisons | Mean difference $\pm$ SEM | Partial $\eta^2$ | df <sup>b</sup> | F      | P                      |
|-----------------------|-----------------------------|----------------------|---------------------------|------------------|-----------------|--------|------------------------|
| Cortisol [ng/ml]      | Treatment                   |                      |                           | <0.01            | 1,18            | 0.77   | 0.785                  |
|                       | Light                       |                      |                           | 0.48             | 1,18            | 16.53  | $7.25 \times 10^{-04}$ |
|                       | Treatment $\times$ Light    |                      |                           | 0.63             | 1,18            | 30.44  | $3.08 \times 10^{-05}$ |
|                       | <i>Simple main effects:</i> | LD – on vs. off      | $1.2 \pm 1.2$             | 0.05             | 1,18            | 0.96   | 0.341                  |
|                       |                             | SD – on vs. off      | $-7.7 \pm 1.1$            | 0.74             | 1,18            | 51.02  | $1.18 \times 10^{-06}$ |
|                       |                             | On – SD vs. LD       | $4.9 \pm 1.9$             | 0.26             | 1,18            | 6.21   | 0.023                  |
|                       |                             | Off – SD vs. LD      | $-4.0 \pm 1.5$            | 0.29             | 1,18            | 7.19   | 0.015                  |
| Activity behavior [%] | Treatment                   |                      |                           | 0.78             | 1,18            | 64.46  | $2.33 \times 10^{-07}$ |
|                       | Light                       |                      |                           | 0.95             | 1,18            | 352.76 | $2.84 \times 10^{-13}$ |
|                       | Treatment $\times$ Light    |                      |                           | 0.43             | 1,18            | 13.54  | 0.002                  |
|                       | <i>Simple main effects:</i> | LD – on vs. off      | $-25.7 \pm 2.5$           | 0.85             | 1,18            | 103.67 | $6.76 \times 10^{-09}$ |
|                       |                             | SD – on vs. off      | $-38.2 \pm 2.3$           | 0.94             | 1,18            | 280.29 | $2.02 \times 10^{-12}$ |
|                       |                             | On – SD vs. LD       | $18.9 \pm 3.2$            | 0.66             | 1,18            | 35.54  | $1.22 \times 10^{-05}$ |
|                       |                             | Off – SD vs. LD      | $6.4 \pm 0.8$             | 0.77             | 1,18            | 59.41  | $4.14 \times 10^{-07}$ |
| Hematocrit [%]        | Treatment                   |                      |                           | 0.02             | 1,18            | 0.39   | 0.540                  |
|                       | Light                       |                      |                           | 0.93             | 1,18            | 245.71 | $6.16 \times 10^{-12}$ |
|                       | Treatment $\times$ Light    |                      |                           | 0.05             | 1,18            | 0.95   | 0.342                  |

<sup>a</sup>  $2 \times 2$  mixed factorial ANOVA with treatment (LD/SD) as between-subjects factor and light (on/off) as within-subjects repeated factor was performed on mean values calculated from the 26 samplings per pig, divided into values during lights-on or lights-off for all animals per treatment (LD n = 9, lights-on = 18 samplings & lights-off = 8 samplings, SD n = 11, lights-on = 10 samplings & lights-off = 16 samplings). If there was a significant interaction effect, simple main effects were analyzed with the least significant difference (LSD) procedure.

<sup>b</sup> Numerator degrees of freedom, denominator degrees of freedom
